# Supplementary material for: Genome-Wide Identification, Characterization, and Expression Analysis of the Grapevine Superoxide Dismutase (SOD) Family
Source: Int J Genomics. 2019 Feb 24;2019:7350414. doi: 10.1155/2019/7350414 (PMC6409070; doi:10.1155/2019/7350414)
Supplement: Supplementary 2 — Table S2: the Ka/Ks ratios for VvSOD proteins which were calculated using MEGA 6.06. [file 7350414.f2.csv]

The Ka/Ks ratios for VvSOD proteins
VvCSD1	VvCSD2	VvCSD3	VvCSD4	VvCSD5	VvCSD6	VvFSD1	VvFSD2	VvMSD1	VvMSD2
VvCSD1	0.565667115	0.370478471	0.498965412	0.582113166	0.600576302	0.574413755	0.694907136	0.590683168	0.770923181
VvCSD2		0.224174374	0.248101109	0.233288537	0.290845161	0.564386902	0.743164533	0.782821826	0.83487058
VvCSD3			0.231830738	0.298302885	0.288842986	0.810409405	0.823168396	0.49267514	0.508135578
VvCSD4				1.294165137	2.30421635	0.623759477	0.874257061	0.508315125	0.650289161
VvCSD5					1.016412492	0.462683549	0.691205621	0.540129744	0.729835639
VvCSD6						0.821245803	1.072234513	0.564352434	0.68554185
VvFSD1							0.427319002	N/C	N/C
VvFSD2								0.47500225	0.718440643
VvMSD1									0.289298363
