# Supplementary material for: Genome-Wide Identification, Characterization, and Expression Analysis of the Grapevine Superoxide Dismutase (SOD) Family
Source: Int J Genomics. 2019 Feb 24;2019:7350414. doi: 10.1155/2019/7350414 (PMC6409070; doi:10.1155/2019/7350414)
Supplement: Supplementary 4 — Table S4: the Pearson correlation coefficient (PCC) value of four treatments. Coexpressed gene pairs were filtered with a PCC cutoff of 0.95. [file 7350414.f4.xlsx]

## Sheet: Sheet1
Table S4 PCC values of four treatments
Treatment	Gene 1	Gene 2	PCC value
Cold	VvCSD2	VvCSD4	0.974
	VvCSD2	VvFSD1	0.984
	VvCSD4	VvFSD1	0.968
Heat	VvCSD1	VvFSD1	-0.965
	VvCSD3	VvMSD2	0.988
	VvCSD4	VvCSD6	0.987
	VvCSD4	VvFSD1	0.966
	VvCSD6	VvFSD1	0.973
Salt	VvFSD1	VvFSD2	0.961
Drought	VvCSD1	VvCSD2	0.952
	VvCSD4	VvCSD6	0.986
	VvFSD1	VvFSD2	0.966
