# Supplementary material for: Genome-Wide Identification, Characterization, and Expression Analysis of the Grapevine Superoxide Dismutase (SOD) Family
Source: Int J Genomics. 2019 Feb 24;2019:7350414. doi: 10.1155/2019/7350414 (PMC6409070; doi:10.1155/2019/7350414)
Supplement: Supplementary 5 — Table S5: the PCR raw data of four treatments. [file 7350414.f5.xlsx]

## Sheet: Sheet1
Cold				Heat				Nacl				Drought
	VvCSD1	actin			VvCSD1	actin			VvCSD1	actin			VvCSD1	ACTIN
0H	32.3167	21.4633		0H	30.3333	22.0733		0H	30.4133	21.85		0d	31.01	21.7033
6H	29.9167	20.7333		6H	26.79	22.0933		6H	29.6033	20.85		2d	30.1967	20.59
12H	29.2367	19.1433		12H	27.18	22.33		12H	31.5167	23.1933		4d	30.2067	21.6467
24H	30.2833	21.8833		24H	27.52	22.43		24H	29.49	20.8833		8d	33	22.8333
	VvCSD2	actin			VvCSD2	actin			VvCSD2	actin		CSD2	VvCSD2	actin
0H	27.9867	21.4633		0H	25.96	22.0733		0H	26.14	21.85		0d	26.8833	21.7033
6H	24.34	20.7333		6H	25.07	22.0933		6H	25.6133	20.85		2d	25.21	20.59
12H	23.7133	19.1433		12H	25.2933	22.33		12H	27.8133	23.1933		4d	25.11	21.6467
24H	25.4733	21.8833		24H	27.0933	22.43		24H	25.6167	20.8833		8d	30.26	22.8333
	VvCSD3	actin			VvCSD3	actin			VvCSD3	actin			VvCSD3	actin
0H	26.5967	22.41		0H	26.48	22.5767		0H	26.2567	22.84		0d	24.34	22.2767
6H	24.32	21.4233		6H	25.5667	22.2267		6H	25.3067	22.8		2d	23.8133	19.75
12H	23.97	21.1033		12H	24.5933	22.16		12H	25.46	23.135		4d	24.9733	20.95
24H	24.9667	19.9767		24H	25.6	22.1567		24H	25.4	22.465		8d	25.9467	22.49
	VvCSD4	actin			VvCSD4	actin			VvCSD4	actin			VvCSD4	actin
0H	26.54	21.4633		0H	26.5167	22.0733		0H	26.4933	21.85		0d	27.0367	21.7033
6H	25.1933	20.7333		6H	27.52	22.0933		6H	25.8267	20.85		2d	24.6833	20.59
12H	24.0333	19.1433		12H	28.4767	22.33		12H	28.9467	23.1933		4d	25.4033	21.6467
24H	26.2467	21.8833		24H	28.1667	22.43		24H	25.6533	20.8833		8d	28.1333	22.8333
	VvCSD6	actin			VvCSD6	actin			VvCSD6	actin			VvCSD6	actin
OH	28.1367	22.7033		0H	27.8667	22.6967		oh	27.8933	22.6467		0d	27.67	21.7033
6H	27.335	22.23		6H	28.5933	22.3533		6H	27.2367	22.47		2d	25.02	20.59
12H	25.9667	21.3533		12H	28.9467	22.1		12H	29.5667	23.1933		4d	25.78	21.6467
24H	24.4567	19.27		24H	29.3967	22.4567		24H	26.3567	22.4333		8d	28.2	22.8333
	VvFSD1	actin			VvFSD1	actin			VvFSD1	actin			VvFSD1	actin
0H	28.78	21.4633		0H	27.73	22.0733		0H	27.7833	21.97		0d	27.69	21.7033
6H	26.3033	20.7333		6H	30.5467	22.0933		6H	27.0767	21.28		2d	25.85	20.59
12H	25.74	19.1433		12H	30.8567	22.33		12H	28.3	22.3933		4d	27.0667	21.6467
24H	27.5867	21.8833		24H	31.1967	22.43		24H	27.24	21.45		8d	30.2267	22.8333
	VvFSD2	actin			VvFSD2	actin			VvFSD2	actin			VvFSD2	actin
0H	26.95	21.4633		0H	27.2767	22.1567		0H	26.76	21.97		0d	26.0633	21.7033
6H	25.0067	20.7333		6H	28.09	23.23		6H	26.09	21.28		2d	24.6333	20.59
12H	24.74	19.1433		12H	29.02	23.2867		12H	27.9833	22.3933		4d	25.7967	21.6467
24H	26.7333	21.8833		24H	29.0267	22.52		24H	26.31	21.45		8d	28.83	22.8333
	VvMSD2	actin			VvMSD2	actin			VvMSD2	actin			VvMSD2	actin
0H	27.8633	22.41		0H	27.1533	22.1567		0H	26.9067	21.97		0d	24.7667	21.7033
6H	26.2933	21.4233		6H	27.81	23.23		6H	26	21.28		2d	24.2	20.59
12H	25.0433	21.1033		12H	27.13	23.2867		12H	27.22	22.3933		4d	25.2567	21.6467
24H	24.12	19.9767		24H	27.4067	22.52		24H	25.8467	21.45		8d	26.7033	22.8333
