# Supplementary material for: Genome-Wide Identification, Characterization, and Expression Analysis of the Grapevine Superoxide Dismutase (SOD) Family
Source: Int J Genomics. 2019 Feb 24;2019:7350414. doi: 10.1155/2019/7350414 (PMC6409070; doi:10.1155/2019/7350414)
Supplement: Supplementary 6 — Table S6: basic information of the 21 TF genes. [file 7350414.f6.xlsx]

## Sheet: Sheet1
Gene ID	Target	Family	GO Term	GO Category	GO Description
VIT_18s0122g00380	VvCSD3	SBP	GO:0042742	Biological Process	defense response to bacterium
	VvFSD2		GO:0045893	Biological Process	positive regulation of transcription, DNA-templated
			GO:0005634	Cellular Component	nucleus
			GO:0005886	Cellular Component	plasma membrane
			GO:0003677	Molecular Function	DNA binding
VIT_17s0000g01260	VvCSD3	SBP	GO:0048653	Biological Process	anther development
	VvFSD2		GO:0005634	Cellular Component	nucleus
			GO:0003677	Molecular Function	DNA binding
VIT_08s0007g06270	VvCSD3	SBP	GO:0010228	Biological Process	vegetative to reproductive phase transition of meristem
	VvFSD2		GO:0048653	Biological Process	anther development
			GO:2000025	Biological Process	regulation of leaf formation
			GO:0005634	Cellular Component	nucleus
			GO:0003677	Molecular Function	DNA binding
VIT_19s0085g00940	VvCSD3	MYB	GO:0003677	Molecular Function	DNA binding
	VvCSD4
	VvCSD5
	VvFSD2
VIT_04s0008g01470	VvCSD1	WRKY	GO:0006355	Biological Process	regulation of transcription, DNA-templated
	VvCSD3		GO:0009867	Biological Process	jasmonic acid mediated signaling pathway
	VvCSD6		GO:0050832	Biological Process	defense response to fungus
			GO:0003700	Molecular Function	transcription factor activity, sequence-specific DNA binding
			GO:0043565	Molecular Function	sequence-specific DNA binding
VIT_07s0141g00100	VvCSD3	MYB	GO:0009733	Biological Process	response to auxin
			GO:0009737	Biological Process	response to abscisic acid
			GO:0009751	Biological Process	response to salicylic acid
	VvMSD2		GO:0003677	Molecular Function	DNA binding
VIT_07s0031g01980	VvCSD1	ERF	GO:0006355	Biological Process	regulation of transcription, DNA-templated
	VvCSD4		GO:0006970	Biological Process	response to osmotic stress
	VvMSD1		GO:0009749	Biological Process	response to glucose
			GO:0009788	Biological Process	negative regulation of abscisic acid-activated signaling pathway
			GO:0050832	Biological Process	defense response to fungus
			GO:0005634	Cellular Component	nucleus
			GO:0003677	Molecular Function	DNA binding
			GO:0003700	Molecular Function	transcription factor activity, sequence-specific DNA binding
VIT_05s0020g03880	VvCSD4	CPP
	VvCSD5
	VvCSD6
VIT_14s0066g00680	VvCSD1	LBD	GO:0010199	Biological Process	organ boundary specification between lateral organs and the meristem
	VvCSD4
	VvMSD1
	VvMSD2
VIT_07s0005g03260	VvCSD1	ERF	GO:0006355	Biological Process	regulation of transcription, DNA-templated
	VvCSD4		GO:0006952	Biological Process	defense response
	VvFSD2		GO:0009873	Biological Process	ethylene-activated signaling pathway
			GO:0005634	Cellular Component	nucleus
			GO:0003677	Molecular Function	DNA binding
			GO:0003700	Molecular Function	transcription factor activity, sequence-specific DNA binding
VIT_19s0014g01680	VvCSD5	TCP	GO:0009793	Biological Process	embryo development ending in seed dormancy
	VvFSD2		GO:0009965	Biological Process	leaf morphogenesis
	VvMSD2		GO:0030154	Biological Process	cell differentiation
			GO:0045962	Biological Process	positive regulation of development, heterochronic
			GO:0003677	Molecular Function	DNA binding
VIT_15s0048g02870	VvCSD5	HD-ZIP	GO:0009414	Biological Process	response to water deprivation
	VvCSD6		GO:0009738	Biological Process	abscisic acid-activated signaling pathway
			GO:0045893	Biological Process	positive regulation of transcription, DNA-templated
			GO:0005634	Cellular Component	nucleus
			GO:0003700	Molecular Function	transcription factor activity, sequence-specific DNA binding
			GO:0043565	Molecular Function	sequence-specific DNA binding
VIT_15s0046g03190	VvCSD3	MYB	GO:0009751	Biological Process	response to salicylic acid
	VvFSD2		GO:0009753	Biological Process	response to jasmonic acid
	VvMSD2		GO:0009909	Biological Process	regulation of flower development
			GO:0003677	Molecular Function	DNA binding
VIT_204s0023g00950	VvCSD1	AP2	GO:0006355	Biological Process	regulation of transcription, DNA-templated
	VvCSD2		GO:0005634	Cellular Component	nucleus
	VvCSD3		GO:0003677	Molecular Function	DNA binding
	VvCSD4		GO:0003700	Molecular Function	transcription factor activity, sequence-specific DNA binding
	VvCSD5
	VvCSD6
	VvFSD1
	VvFSD2
	VvMSD1
VIT_10s0003g00140	VvCSD1	ERF	GO:0009723	Biological Process	response to ethylene
	VvCSD4		GO:0009737	Biological Process	response to abscisic acid
			GO:0009864	Biological Process	induced systemic resistance, jasmonic acid mediated signaling pathway
			GO:0010200	Biological Process	response to chitin
			GO:0045892	Biological Process	negative regulation of transcription, DNA-templated
			GO:0016604	Cellular Component	nuclear body
			GO:0003677	Molecular Function	DNA binding
			GO:0003700	Molecular Function	transcription factor activity, sequence-specific DNA binding
VIT_17s0000g04850	VvCSD1	Dof	GO:0006355	Biological Process	regulation of transcription, DNA-templated
	VvCSD5		GO:0044212	Molecular Function	transcription regulatory region DNA binding
	VvCSD6
	VvFSD2
VIT_14s0068g00860	VvCSD1	ERF	GO:0006355	Biological Process	regulation of transcription, DNA-templated
	VvCSD4		GO:0009739	Biological Process	response to gibberellin
	VvMSD2		GO:0010030	Biological Process	positive regulation of seed germination
			GO:0005634	Cellular Component	nucleus
			GO:0003677	Molecular Function	DNA binding
			GO:0003700	Molecular Function	transcription factor activity, sequence-specific DNA binding
VIT_17s0000g06020	VvCSD5	TCP	GO:0007623	Biological Process	circadian rhythm
	VvFSD2		GO:0008283	Biological Process	cell proliferation
	VvMSD2		GO:0009735	Biological Process	response to cytokinin
			GO:0010229	Biological Process	inflorescence development
			GO:0010252	Biological Process	auxin homeostasis
			GO:0031540	Biological Process	regulation of anthocyanin biosynthetic process
			GO:0042023	Biological Process	DNA endoreduplication
			GO:0048467	Biological Process	gynoecium development
VIT_15s0048g01150	VvCSD5	TCP	GO:0008361	Biological Process	regulation of cell size
	VvFSD2		GO:0048364	Biological Process	root development
	VvMSD2		GO:1900056	Biological Process	negative regulation of leaf senescence
			GO:0005634	Cellular Component	nucleus
VIT_15s0021g01610	VvCSD1	ERF	GO:0001944	Biological Process	vasculature development
	VvCSD4		GO:0009864	Biological Process	induced systemic resistance, jasmonic acid mediated signaling pathway
	VvFSD2		GO:0010200	Biological Process	response to chitin
			GO:0045893	Biological Process	positive regulation of transcription, DNA-templated
			GO:0051301	Biological Process	cell division
			GO:0005634	Cellular Component	nucleus
			GO:0003677	Molecular Function	DNA binding
			GO:0003700	Molecular Function	transcription factor activity, sequence-specific DNA binding
VIT_17s0000g08290	VvCSD1	Dof	GO:0010067	Biological Process	procambium histogenesis
	VvCSD2		GO:0010087	Biological Process	phloem or xylem histogenesis
	VvCSD3		GO:0045893	Biological Process	positive regulation of transcription, DNA-templated
	VvCSD4		GO:0005634	Cellular Component	nucleus
	VvCSD5		GO:0003677	Molecular Function	DNA binding
	VvFSD2
	VvMSD2
